# Supplementary material for: A Phase I/II Trial of Belinostat in Combination with Cisplatin, Doxorubicin, and Cyclophosphamide in Thymic Epithelial Tumors: A Clinical and Translational Study
Source: Oxford University Press journal article supplement (doi:10.1158/1078-0432.ccr-14-0968), 2014-09-05
Supplement: 10780432ccr140968-sup-130360_2_supp_2553544_n82r2c.doc [file 10780432ccr140968-sup-130360_2_supp_2553544_n82r2c.doc]

**Supplementary Tables**

| **Table S1.** Dose escalation scheme | | | | |
| --- | --- | --- | --- | --- |
| Dose Level | Belinostat (mg/m2/12 hour dose)  CIVI over 12 hours X 4 (total 48h)  Days 1 & 2  (4 doses per cycle) | Cisplatin (mg/m2/dose)  IV over 60 minutes  Day 2  (1 dose/cycle) | Doxorubicin (mg/m2/dose)  IV over 3-5 minutes  Days 2 & 3  (2 doses/cycle) | Cyclophosphamide (mg/m2/dose)  IV over 60 minutes  Day 3  (1 dose/cycle) |
| -1 | 125 | 50 | 25 | 500 |
| 1 | 250 | 50 | 25 | 500 |
| 2 | 500 | 50 | 25 | 500 |
| 3 | 500 | 70 | 25 | 500 |
| 4 | 500 | 70 | 25 | 1000 |

| **Table S2.** Disease and treatment characteristics and outcomes of patients who underwent multimodality therapy | | | | | | | | | | | | | |
| --- | --- | --- | --- | --- | --- | --- | --- | --- | --- | --- | --- | --- | --- |
| Patient no: | Age/ Sex | Histology | Prior surgical resection | ECOG PS at study entry | Stage at study entry | No. of cycles of PACB | Best response (% tumor shrinkage) | Extent of surgical resection | Completeness of Surgery | RT fields | RT Dose^/ Fractions | Disease-free Survival (months) | Overall Survival (months) |
| 001 | 35/M | B2Thymoma | No | 1 | IVA | 6 | PR  (-62%) | Median sternotomy with resection of residual thymoma, en bloc resection of pericardium, medial portions of right upper and right middle lobes, left innominate vein and superior vena cava with Gore-Tex interposition graft reconstruction of the superior vena cava. Complete right parietal pleurectomy, right pulmonary metastasectomy, low cervical lymph node dissection bilateral, reconstruction of pericardium, anterior chest wall resection with Marlex, methyl methacrylate reconstruction. | R1 | Mediastinum/Tumor bed | 45/25 | 18 | 42+ |
| 005 | 71/F | TC | No | 1 | IVA | 5 | PR (-47%) | Median sternotomy with resection of thymic carcinoma and plication of left hemidiaphragm. | R1 | Mediastinum/Tumor bed | 59/33 | 23+ | 30+ |
| 009 | 50/M | B1Thymoma | No | 0 | IVA | 6 | PR (-47%) | median sternotomy with resection of residual thymoma, including en bloc segmental resection of right upper lobe and right middle lobe, pericardiectomy, resection of right diaphragmatic mass with primary repair of right hemidiaphragm, and completion parietal pleurectomy. | R1 | Not available | Yes | 20+ | 26+ |
| 011 | 40/F | B1Thymoma | Yes | 0 | IVB | 6 | PR (-67%) | Left posterolateral thoracotomy with parietal pleurectomy and resection and primary repair of diaphragm | R0 | NA | No | 15+ | 21+ |
| 016 | 53/M | TC | No | 1 | IVB | 6 | SD (-28%) | Left hemi-clamshell thoracotomy with resection of residual thymic carcinoma, en bloc resection of left phrenic nerve, radical pericardiectomy, and plication of left diaphragm | R0 | Anterior mediastinum | 60/30 | 6 weeks | 16 |
| 017 | 47/M | TC | Yes | 0 | IVA | 6 | SD (-26%) | Left posterior lateral thoracotomy with extensive lysis of adhesions. Left lower lobe lobectomy with en bloc resection of partial diaphragm resection and primary pledgeted repair. Multiple pleural resections of subcentimeter plaque lesions. Extrapleural en bloc resection of costophrenic recess nodularity with small portion of diagphram and primary pledgeted repair. | R0 | Not available | Yes | 10+ | 15+ |
| 018 | 65/M | TC | No | 1 | IVB | 6 | PR (-67%) | Exploratory sternal-antero-lateral thoracotomy. Resection of anterior mediastinal compartment tissues-thymectomy. Wedge resection of right middle lobe lung lesion. Excisional resection of interlobar nodule. Resection of right apical chest wall plaque lesion. Excisional biopsy of chest pleura at mid lung field and lower chest. | R0 | Mediastinum | 60/30 | 4 | 11 |
| 020 | 62/F | TC | No | 1 | IVB | 6 | SD (-11%) | Median sternotomy and resection of thymic carcinoma with en-bloc excision of left innominate vein and proximal superior vena cava, and Gore-Tex interposition graft reconstruction of SVC. | R1 | Not available | Yes | 6+ | 12+ |
| 022 | 59/M | TC | No | 0 | IVB | 6 | SD  (-29%) | Median sternotomy with resection of residual mediastinal thymic carcinoma and right parietal pleurectomy | R0 | Not available | Yes | 4+ | 9+ |

^ Radiation dose in Gray
Disease-free survival was assessed from the time of surgery and overall survival assessed from the on-study date
+ after disease-free survival indicates that patient remains disease free at data cut-off
+ after overall survival indicates that patient is alive at data cut-off
Abbreviations: PR, partial response; SD, stable disease; ECOG PS, Eastern Cooperative Oncology Group Performance Status; RT, radiation therapy; PACB, cisplatin, adriamycin, cyclophosphamide, belinostat; TC, thymic carcinoma

| **Table S3.** Cycle 1 pharmacokinetic parameters of belinostat, mean ± standard deviation (%CV) | | | | | | | |
| --- | --- | --- | --- | --- | --- | --- | --- |
| Belinostat dose | Tmax (hr) | t1/2 (hr) | Cmax* (ng/ml) | Cmax/dose (ng/ml/mg) | AUCINF (hr ng/ml) | AUCINF/dose (hr ng/ml/mg) | CL  (L/hr) |
| 250 mg/m2 (n=24) | 25.28±22.29 (88%) | 0.47±0.19  (40%) | 650.6±288.1 (44%) | 0.36±0.21 (58%) | 19,756±7,634 (39%) | 10.78±5.57 (52%) | 133.5±145.1 (109%) |
| 500 mg/m2 (n=1)** | 50.0 | 0.40 | 1,202 | 0.31 | 29,686 | 7.57 | 132.1 |
| *Dose normalized parameters are normalized to absolute total dose (over 48 hours CIVI) for that patient, not dose level  **One patient was excluded from pharmacokinetic analysis due to insufficient sampling  Abbreviations: Cmax, maximum plasma concentration; Tmax, time to Cmax; AUCINF, area under the plasma concentration vs. timecurve extrapolated to infinity; %CV, percentage coefficient of variation, a measure of inter-patient variability | | | | | | | |
